# Supplementary material for: Assessment of Helicobacter pylori status by examination of gastric mucosal patterns: diagnostic accuracy of white-light endoscopy and narrow-band imaging
Source: PubMed Central journal article supplement — BMJ Open Gastroenterol. 2021 Aug 5;8(1):e000608. doi: 10.1136/bmjgast-2021-000608 (PMC8344320; doi:10.1136/bmjgast-2021-000608), 2021-08-05
Supplement: bmjgast-2021-000608supp001.pdf [file bmjgast-2021-000608supp001.pdf]

**Supplementary data:** Processing summary of final logistic regression model. NB: Mucosal Oedema was incorporated with Diffuse Redness to be considered as a single variable (i.e. either DR or MO or both are present) as results of initial analysis indicated these should be merged.

### Case Processing Summary

|                                          |            | N               | Marginal Percentage |
|------------------------------------------|------------|-----------------|---------------------|
| True status based on history and results | naive      | 94              | 76.4%               |
|                                          | active     | 22              | 17.9%               |
|                                          | infection  |                 |                     |
|                                          | eradicated | 7               | 5.7%                |
| Is the RAC present?                      | no         | 30              | 24.4%               |
|                                          | yes        | 93              | 75.6%               |
| Is there diffuse redness?                | no         | 87              | 70.7%               |
|                                          | yes        | 36              | 29.3%               |
| Is there map-like or patch redness?      | no         | 116             | 94.3%               |
|                                          | yes        | 7               | 5.7%                |
| Valid                                    |            | 123             | 100.0%              |
| Missing                                  |            | 0               |                     |
| Total                                    |            | 123             |                     |
| Subpopulation                            |            | 91 <sup>a</sup> |                     |

a. The dependent variable has only one value observed in 83 (91.2%) subpopulations.

### Model Fitting Information

| Model          | Model Fitting     | Likelihood Ratio Tests |    |      |
|----------------|-------------------|------------------------|----|------|
|                | Criteria          | Chi-Square             | df | Sig. |
|                | -2 Log Likelihood |                        |    |      |
| Intercept Only | 152.075           |                        |    |      |
| Final          | 130.189           | 21.886                 | 8  | .005 |

**Goodness-of-Fit**

|          | Chi-Square | df  | Sig. |
|----------|------------|-----|------|
| Pearson  | 186.224    | 172 | .217 |
| Deviance | 118.156    | 172 | .999 |

**Pseudo R-Square**

|               |      |
|---------------|------|
| Cox and Snell | .163 |
| Nagelkerke    | .220 |
| McFadden      | .132 |

## Parameter Estimates

| True status based on history and results <sup>a</sup> | B                                       | Std. Error     | Wald  | df    | Sig. | Exp(B) | 95% Confidence Interval for Exp(B) |              |
|-------------------------------------------------------|-----------------------------------------|----------------|-------|-------|------|--------|------------------------------------|--------------|
|                                                       |                                         |                |       |       |      |        | Lower Bound                        | Upper Bound  |
| naive                                                 | Intercept                               | 3.278          | 2.471 | 1.760 | 1    | .185   |                                    |              |
|                                                       | Patient age                             | -.017          | .024  | .501  | 1    | .479   | .983                               | .937 1.031   |
|                                                       | [Is the RAC present?=0]                 | .018           | 1.200 | .000  | 1    | .988   | 1.018                              | .097 10.708  |
|                                                       | [Is the RAC present?=1]                 | 0 <sup>b</sup> | .     | .     | 0    | .      | .                                  | .            |
|                                                       | [Is there diffuse redness?=0]           | -.886          | 1.156 | .587  | 1    | .444   | .412                               | .043 3.977   |
|                                                       | [Is there diffuse redness?=1]           | 0 <sup>b</sup> | .     | .     | 0    | .      | .                                  | .            |
|                                                       | [Is there map-like or patch redness?=0] | 1.114          | 1.274 | .764  | 1    | .382   | 3.046                              | .251 36.982  |
|                                                       | [Is there map-like or patch redness?=1] | 0 <sup>b</sup> | .     | .     | 0    | .      | .                                  | .            |
| active infection                                      | Intercept                               | .947           | 2.706 | .122  | 1    | .726   |                                    |              |
|                                                       | Patient age                             | -.020          | .028  | .533  | 1    | .465   | .980                               | .927 1.035   |
|                                                       | [Is the RAC present?=0]                 | 2.339          | 1.260 | 3.448 | 1    | .063   | 10.371                             | .878 122.476 |
|                                                       | [Is the RAC present?=1]                 | 0 <sup>b</sup> | .     | .     | 0    | .      | .                                  | .            |
|                                                       | [Is there diffuse redness?=0]           | -.635          | 1.246 | .260  | 1    | .610   | .530                               | .046 6.087   |
|                                                       | [Is there diffuse redness?=1]           | 0 <sup>b</sup> | .     | .     | 0    | .      | .                                  | .            |
|                                                       | [Is there map-like or patch redness?=0] | 1.125          | 1.478 | .579  | 1    | .447   | 3.079                              | .170 55.793  |
|                                                       | [Is there map-like or patch redness?=1] | 0 <sup>b</sup> | .     | .     | 0    | .      | .                                  | .            |

a. The reference category is: eradicated.

**Likelihood Ratio Tests**

| Effect                              | Model Fitting                      | Likelihood Ratio Tests |    |      |
|-------------------------------------|------------------------------------|------------------------|----|------|
|                                     | Criteria                           | Chi-Square             | df | Sig. |
|                                     | -2 Log Likelihood of Reduced Model |                        |    |      |
| Intercept                           | 130.189 <sup>a</sup>               | .000                   | 0  | .    |
| Patient age                         | 130.778                            | .590                   | 2  | .745 |
| Is the RAC present?                 | 147.547                            | 17.358                 | 2  | .000 |
| Is there diffuse redness?           | 130.985                            | .796                   | 2  | .672 |
| Is there map-like or patch redness? | 130.867                            | .678                   | 2  | .712 |

**Classification**

| Observed           | Predicted |                  |            | Percent Correct |
|--------------------|-----------|------------------|------------|-----------------|
|                    | naive     | active infection | eradicated |                 |
| naive              | 88        | 6                | 0          | 93.6%           |
| active infection   | 17        | 5                | 0          | 22.7%           |
| eradicated         | 6         | 1                | 0          | 0.0%            |
| Overall Percentage | 90.2%     | 9.8%             | 0.0%       | 75.6%           |
